# Supplementary material
Source: MDPI journal article supplement (https://www.mdpi.com/2073-4433/11/8/851)
Supplement: s1 [file s1]

# Supplementary Materials:

Robin L. Ersing <sup>1,\*</sup>, Christianne Pearce <sup>2</sup>, Jennifer Collins <sup>2</sup>, Michelle E. Saunders <sup>2</sup> and Amy Polen <sup>3</sup>

## Hurricane Evacuation Decision Making and Risk Perception Survey

1. WERE YOU LIVING IN PINELLAS COUNTY AT THE TIME OF HURRICANE IRMA IN 2017?  
 Yes                       No
  
2. What is your age? \_\_\_\_\_
  
3. With regards to Hurricane Irma in 2017, did your household  
 Go to a shelter outside of evacuation zone  
 Stay at home or in your local area  
 Leave the area threatened by Hurricane Irma, but did not go to a shelter
  
4. Did your household leave the area threatened by any hurricanes between 2004 and 2016?  
 Yes  
 No  
 DK
  
5. Not counting Hurricane Irma, what was the LAST hurricane you remember evacuating for?  
\_\_\_\_\_
  
6. When did you decide to evacuate or not for Hurricane Irma e.g. Day of, or 2 days before?  
\_\_\_\_\_
  
7. What is the City and Zip you were at when you made your decision to evacuate or not?  
CITY: \_\_\_\_\_                      ZIP: \_\_\_\_\_
  
8. Have you moved since Hurricane Irma?  
 No  
 Yes, new City: \_\_\_\_\_ Zip: \_\_\_\_\_

9. On a scale of 0-4, with 0 being Not relied on at all & 4 being relied on the MOST, please rate the following hurricane information sources on how much you RELIED on it in your decision to stay or go.

|                                                                                                  | NOT relied on at all | Relied on only a little | Relied on | Relied on a lot | MOST relied on |
|--------------------------------------------------------------------------------------------------|----------------------|-------------------------|-----------|-----------------|----------------|
| National Media<br>(e.g. Weather Channel, CNN, etc.)                                              | 0                    | 1                       | 2         | 3               | 4              |
| Local Media<br>(e.g. Local news or cable shows)                                                  | 0                    | 1                       | 2         | 3               | 4              |
| Electronic Media<br>(e.g. Internet news and weather websites)<br><b>LIST websites used most:</b> | 0                    | 1                       | 2         | 3               | 4              |
| Print Media<br>(e.g. Newspapers)                                                                 | 0                    | 1                       | 2         | 3               | 4              |
| Radio broadcasts<br>(e.g. AM, FM, Satellite)                                                     | 0                    | 1                       | 2         | 3               | 4              |
| Government Officials (e.g. Emergency managers, elected officials, etc)                           | 0                    | 1                       | 2         | 3               | 4              |
| Family nearby you<br>(within 50 miles away)                                                      | 0                    | 1                       | 2         | 3               | 4              |
| Family a distance from you<br>(50 or more miles away)                                            | 0                    | 1                       | 2         | 3               | 4              |
| Neighbors                                                                                        | 0                    | 1                       | 2         | 3               | 4              |
| Friends nearby you<br>(less than 50 miles away)                                                  | 0                    | 1                       | 2         | 3               | 4              |

|                                                        |   |   |   |   |   |
|--------------------------------------------------------|---|---|---|---|---|
| Friends a distance from you<br>(50 or more miles away) | 0 | 1 | 2 | 3 | 4 |
| Social networking (e.g. facebook,<br>twitter)          | 0 | 1 | 2 | 3 | 4 |
| Other (specify):                                       | 0 | 1 | 2 | 3 | 4 |

10. If you left the threatened area with Hurricane Irma, did anyone in your household evacuate with you and why? \_\_\_\_\_

11. If you did not leave the threatened area with Hurricane Irma, did anyone in your household stay with you and why? \_\_\_\_\_

12. Did anyone **outside** your household stay with you or evacuate with you? If so who (i.e. what relationship do they have to you: relation (what?), neighbor etc)? \_\_\_\_\_

13. If you have pets, did that influence your decision to evacuate or not? \_\_\_\_\_

14. Which evacuation zone were you living in at the time of Irma?

- Zone A
- Zone B
- Zone C
- Zone D
- Zone E
- None
- Don't know

15. Which type of evacuation zone were you living in at the time of Irma?

- Mandatory
- Voluntary
- None
- Don't Know

16. If you were in an area that received an evacuation order did you follow that order?

- Yes
- No

17. What do you understand ‘Hurricane Warning’ to mean? Choose one answer.

|                                                                                            |  |
|--------------------------------------------------------------------------------------------|--|
| A hurricane could possibly impact the area in 24 hours or less                             |  |
| A hurricane is expected to impact an area in the next 36 hours.                            |  |
| The anticipated onset of tropical- <b>storm</b> -force winds are expected within 36 hours. |  |
| Don't Know                                                                                 |  |

18. Please rate the following questions regarding your friends and family on a scale of 1-4, where 1 is strongly disagree and 4 is strongly agree.

|                                                                      | Strongly Disagree | Disagree | Agree | Strongly Agree |
|----------------------------------------------------------------------|-------------------|----------|-------|----------------|
| Most of my friends know each other                                   | 1                 | 2        | 3     | 4              |
| My good friends also know my family members                          | 1                 | 2        | 3     | 4              |
| My neighbors come to my parties                                      | 1                 | 2        | 3     | 4              |
| I send my neighbors holiday cards                                    | 1                 | 2        | 3     | 4              |
| At work, I meet completely different people than during leisure time | 1                 | 2        | 3     | 4              |
| I do not easily ask for help when I need it                          | 1                 | 2        | 3     | 4              |
| I can't expect my neighbors to help me with serious problems         | 1                 | 2        | 3     | 4              |
| I can't expect my colleagues to help me with serious problems        | 1                 | 2        | 3     | 4              |
| Before I trust someone, I have to be sure of his/her intentions      | 1                 | 2        | 3     | 4              |

19. Please rate how the following influenced your decision to evacuate or not for Hurricane Irma. 0 didn't influence at all, 4 influenced most.

|                           | NOT influenced me at all | Influenced only a little | Influenced | Influenced a lot | MOST Influenced me |
|---------------------------|--------------------------|--------------------------|------------|------------------|--------------------|
| Flooding from storm surge | 0                        | 1                        | 2          | 3                | 4                  |
| Strong winds              | 0                        | 1                        | 2          | 3                | 4                  |
| Flooding from rain        | 0                        | 1                        | 2          | 3                | 4                  |

|                                          |   |   |   |   |   |
|------------------------------------------|---|---|---|---|---|
| Size of Storm                            | 0 | 1 | 2 | 3 | 4 |
| Tornadoes                                | 0 | 1 | 2 | 3 | 4 |
| Social factors such as being with family | 0 | 1 | 2 | 3 | 4 |
| Other. Please state.                     |   |   |   |   |   |

20. Had Pinellas County received a direct hit, here is what could have happened. **(Show visual of the storm surge impact to the current location).**

Would you have made the same decisions?

No, because \_\_\_\_\_

Yes, because \_\_\_\_\_

21. Will you choose to evacuate the next time there is a major hurricane forecasted to impact your area?

YES

NO

If no, why? Check all that apply:

Transportation issues

Pets

Family members

Disabilities

Risk of damage to house

Risk of looting

Finances

Other reasons: \_\_\_\_\_

If yes, why? Check all that apply:

House may flood

Wind damage may occur

Safety

Power outage issues

Other reasons: \_\_\_\_\_

**22. These couple of questions will help us gather some demographic information for the study. Again, please remember that this information will remain confidential and will not be linked back to you.**

|                                                                       |                              |                             |             |
|-----------------------------------------------------------------------|------------------------------|-----------------------------|-------------|
| Does anyone in Hshold have a disability?                              | <input type="checkbox"/> Yes | <input type="checkbox"/> No |             |
| How long have you lived in FL?                                        | _____ weeks                  | _____ months                | _____ years |
| Have you ever lived in another state that was impacted by hurricanes? | <input type="checkbox"/> Yes | <input type="checkbox"/> No |             |
| If so, how long were you there?                                       | HOW LONG?<br>_____           |                             |             |

|                               |                                                                               |                                                                                    |                                                                                     |                                                                                                 |
|-------------------------------|-------------------------------------------------------------------------------|------------------------------------------------------------------------------------|-------------------------------------------------------------------------------------|-------------------------------------------------------------------------------------------------|
| Gender                        | <input type="checkbox"/> Male                                                 | <input type="checkbox"/> Female                                                    |                                                                                     |                                                                                                 |
| Ethnicity                     | <input type="checkbox"/> African American                                     | <input type="checkbox"/> Latino                                                    | <input type="checkbox"/> White                                                      | <input type="checkbox"/> Asian/Pacific Islander<br><br><input type="checkbox"/> Other (specify) |
| Education (highest completed) | <input type="checkbox"/> < HS grad                                            | <input type="checkbox"/> HS Grad/GED                                               | <input type="checkbox"/> Some College                                               | <input type="checkbox"/> College degree (specify)                                               |
| Annual Household Income       | <input type="checkbox"/> < \$20k<br><input type="checkbox"/> \$20k - \$29,999 | <input type="checkbox"/> \$30k-\$39,999<br><input type="checkbox"/> \$40k-\$49,999 | <input type="checkbox"/> \$50k- \$59.999<br><input type="checkbox"/> \$60k-\$69,999 | <input type="checkbox"/> \$70 - \$79,999<br><input type="checkbox"/> \$80k - >                  |

23. Is there anything else you would like to tell us about your Hurricane Irma experience?
